# Supplementary material for: Aqueous ibuprofen sorption by using activated walnut shell biochar: process optimization and cost estimation
Source: Royal Society of Chemistry journal article supplement (doi:10.1039/d2va00015f), 2022-01-01
Supplement: d2va00015f1.pdf [file d2va00015f1.pdf]

## Supplementary Information

### **Aqueous Ibuprofen Sorption by Activated Walnut Shell Biochar: Process optimization and Cost Estimation**

**Manvendra Patel<sup>1</sup>, Abhishek Kumar Chaubey<sup>1</sup>, Charles U. Pittman,  
Jr.<sup>2</sup>, and Dinesh Mohan<sup>1\*</sup>**

<sup>1</sup>School of Environmental Sciences,  
Jawaharlal Nehru University, New Delhi, 110067, India

<sup>2</sup>Department of Chemistry,  
Mississippi State University, Mississippi State, MS 39762-14 9573, USA

---

**Corresponding author:**

**\*School of Environmental Sciences  
Jawaharlal Nehru University  
New Delhi 110067, India  
Email: dm\_1967@hotmail.com  
Phone: 0091-11-26704616  
FAX: 0091-11-26704616**

### S1. Preparation and analysis of ibuprofen solutions

Freshly prepared solutions of ibuprofen were used to avoid any photodegradability. Ibuprofen solutions were made by dissolving ibuprofen in ethanol and double distilled water (DDW). E.g. 50 mg L<sup>-1</sup> solution of ibuprofen was made by taking 50 mg of ibuprofen in 100 ml of ethanol followed by DDW addition to 1 liter using volumetric flask. Ibuprofen solutions were analyzed using a UV-VIS spectrometer at  $\lambda_{\max}$  of 264 nm.

**Table S1. Kinetic equations & isotherm parameters applied for sorption data fitting.**

| Model/Equation             | Equation                             | Parameters explanations                                                                                                                                                                                                                                                                        | Reference                  |
|----------------------------|--------------------------------------|------------------------------------------------------------------------------------------------------------------------------------------------------------------------------------------------------------------------------------------------------------------------------------------------|----------------------------|
| <b>Kinetic equations</b>   |                                      |                                                                                                                                                                                                                                                                                                |                            |
| <b>Pseudo-first order</b>  | $q_t = q_e(1 - e^{-k_1 t})$          | $K_1$ (time <sup>-1</sup> ) is pseudo-first order rate constant, $q_e$ and $q_t$ (mg/g) are the ibuprofen amount adsorbed at equilibrium and at any time (t)                                                                                                                                   | <b>(Lagergren 1898)</b>    |
| <b>Pseudo-second order</b> | $\frac{dq_t}{dt} = k_2(q_e - q_t)^2$ | $k_2$ (g mg <sup>-1</sup> min <sup>-1</sup> ) is the pseudo-second order rate constant, $q_e$ and $q_t$ (mg/g) are the ibuprofen amount adsorbed at equilibrium and at any time (t)                                                                                                            | <b>(Ho and McKay 1999)</b> |
| <b>Isotherm models</b>     |                                      |                                                                                                                                                                                                                                                                                                |                            |
| <b>Langmuir</b>            | $q_e = \frac{Q^0 b C_e}{1 + b C_e}$  | $q_e$ (mg/g) is the ibuprofen amount adsorbed per unit WSAB weight, $C_e$ (mg/L) is equilibrium ibuprofen concentration, $Q^0$ (mg/g) is the monolayer adsorption capacity and $b$ is the constant related to net enthalpy of adsorption (L mg <sup>-1</sup> )                                 | <b>(Langmuir 1916)</b>     |
| <b>Freundlich</b>          | $q_e = K_F C_e^{1/n}$                | $q_e$ (mg/g) is the ibuprofen amount adsorbed per unit WSAB weight, $C_e$ (mg/L) is the equilibrium ibuprofen concentration in the solution, $K_F$ (mg/g) is a constant indicating the relative adsorption capacity of the biochar and $1/n$ is the constant representing adsorption intensity | <b>(Freundlich 1906)</b>   |

Table S2: Determination of point of zero charge ( $\text{pH}_{\text{zpc}}$ )

| Points of reference            |                              | Walnut shell activated biochar (WSAB) |                              |
|--------------------------------|------------------------------|---------------------------------------|------------------------------|
| $\text{pH}_{(\text{initial})}$ | $\text{pH}_{(\text{final})}$ | $\text{pH}_{(\text{initial})}$        | $\text{pH}_{(\text{final})}$ |
| 0                              | 0                            |                                       |                              |
| 2                              | 2                            | <b>2</b>                              | <b>2.01<sup>*</sup></b>      |
| 4                              | 4                            | 4                                     | 2.61                         |
| 6                              | 6                            | 6                                     | 2.64                         |
| 8                              | 8                            | 8                                     | 2.62                         |
| 10                             | 10                           | 10                                    | 2.66                         |
| 12                             | 12                           | -                                     | -                            |

$\text{pH}_{\text{ZPC}}$  for walnut shell activated biochar is 2.0

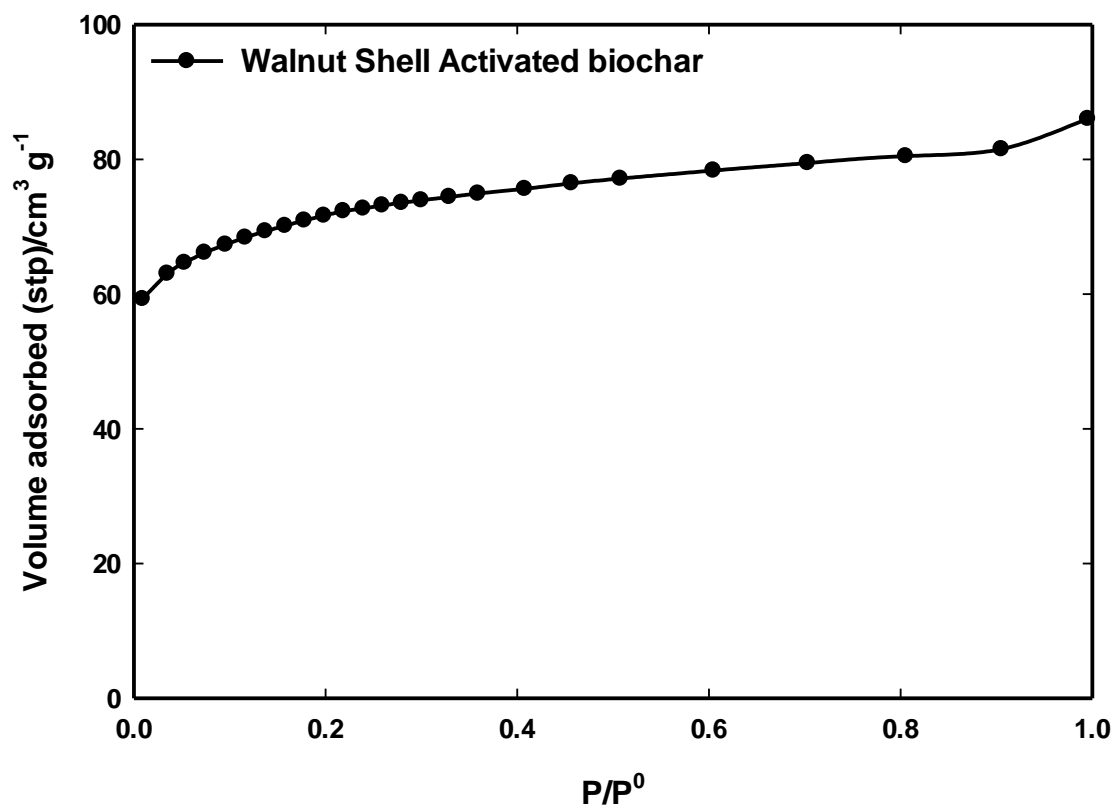Figure S1.  $\text{N}_2$  adsorption isotherm curve of walnut shell activated biochar.

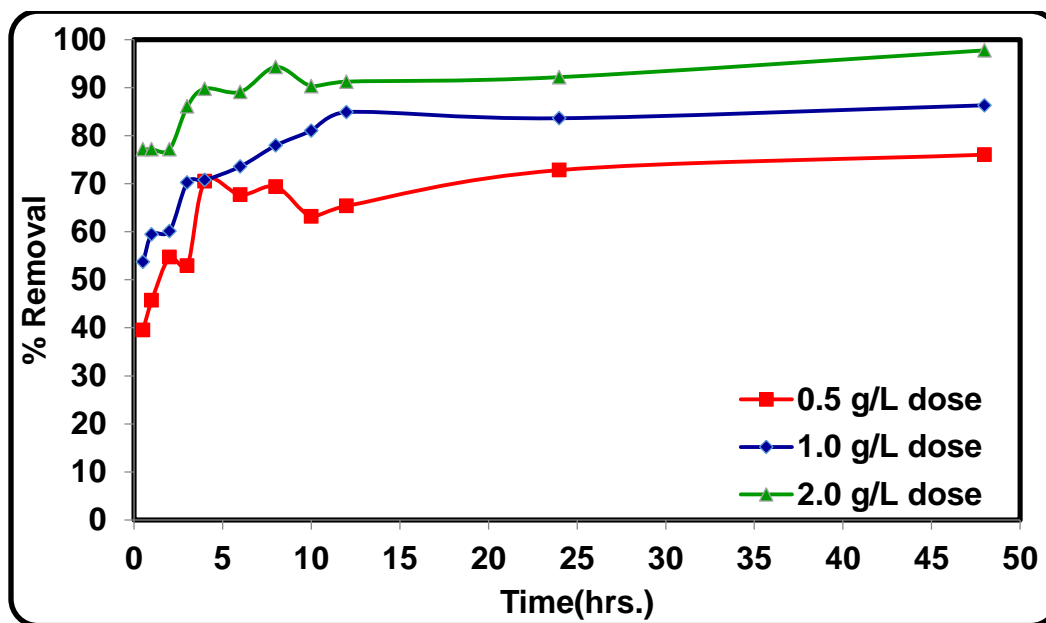

Figure S2. Effect of WSAB dose on ibuprofen adsorption rate [Initial pH = 4.0, temperature = 25 °C and initial concentration = 50 mg L<sup>-1</sup>].

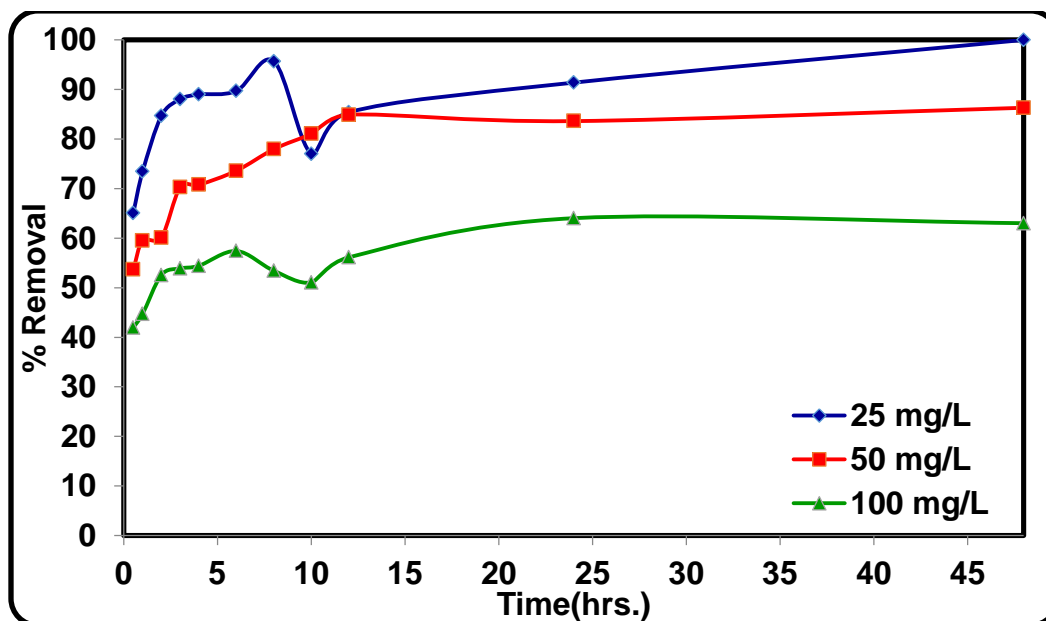

Figure S3. Effect of initial ibuprofen concentration on adsorption rate [Initial pH = 4.0, temperature = 25 °C and dose = 1.0 g L<sup>-1</sup>].

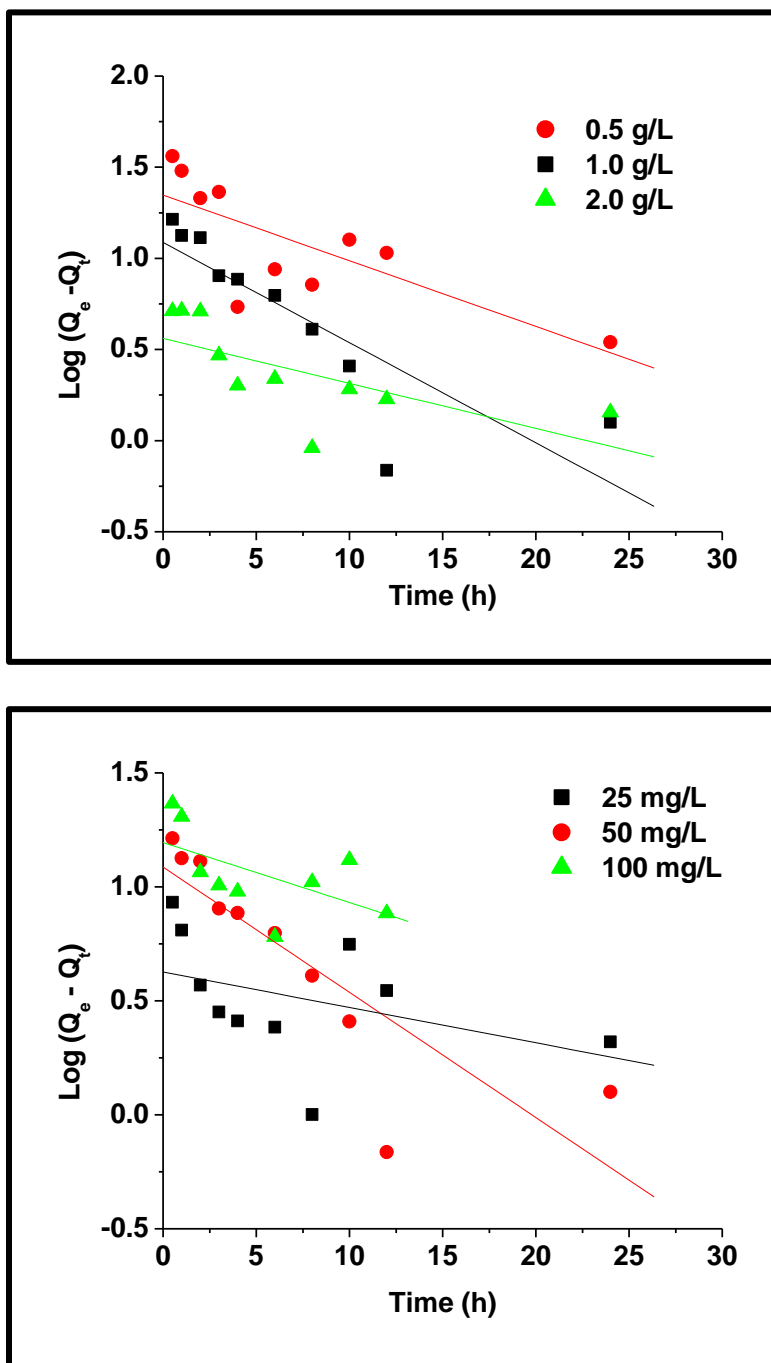

Figure S4. Pseudo-first order fitting curves of ibuprofen adsorption (A) effect of WSAB dose (B) effect of initial ibuprofen concentration [Initial pH = 4.0, temperature = 25 °C].

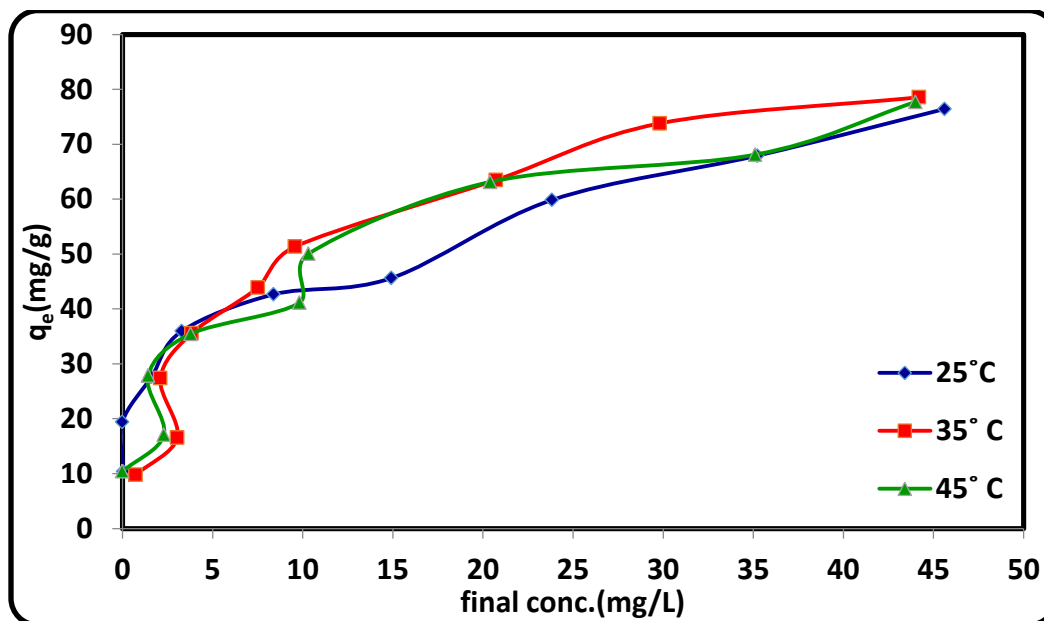

Figure S5. Ibuprofen adsorption isotherms at 25, 35, 45 °C [Initial pH = 4.0, temperature = 25 °C and dose = 1.0 g L<sup>-1</sup>].

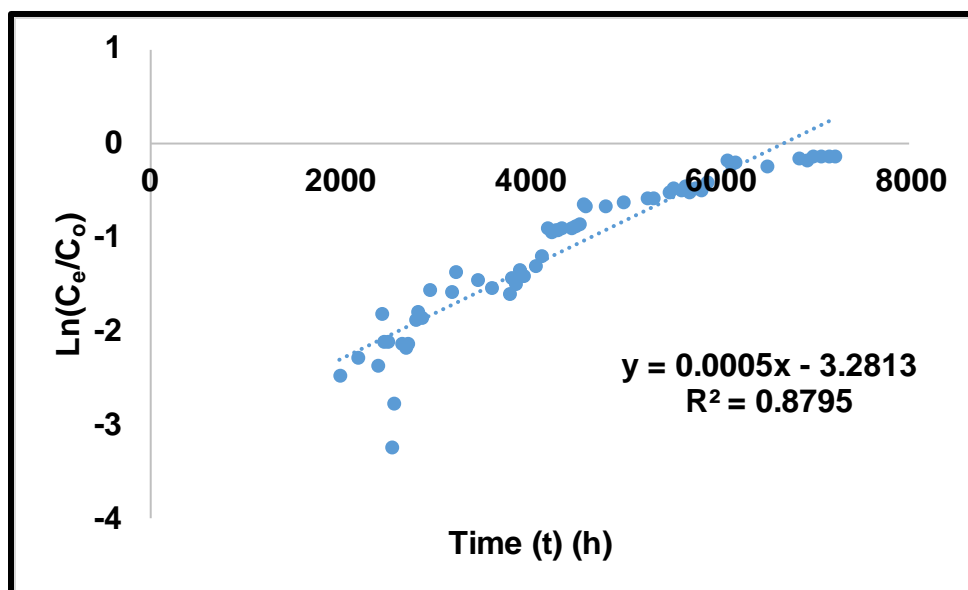

Figure S6. Adams-Bohart model fitting for ibuprofen sorption column data.

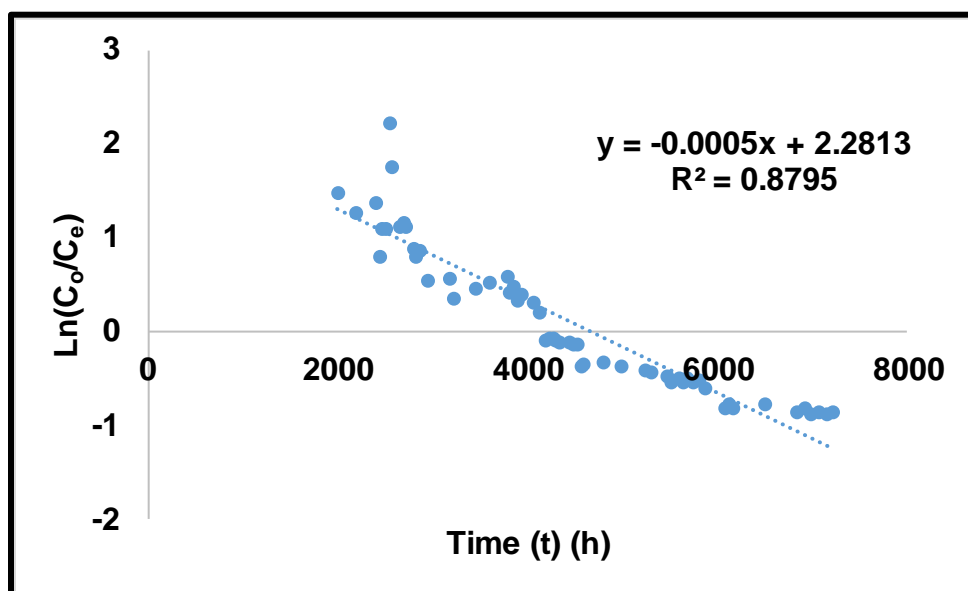

Figure S7. Thomas model fitting for ibuprofen sorption column data.

## References

- Freundlich HMF (1906) Over the adsorption in solution *Journal of Physical Chemistry* 57:1100-1107 doi:10.1063/1.1746922
- Ho Y-S, McKay G (1999) Pseudo-second order model for sorption processes *Process Biochemistry* 34:451-465 doi:10.1016/s0032-9592(98)00112-5
- Lagergren S (1898) About the theory of so-called adsorption of soluble substances *K Sven Vetenskapsakad Handl* 24:1-39 doi:10.1021/ja02268a002
- Langmuir I (1916) The constitution and fundamental properties of solids and liquids. Part I. Solids *Journal of the American Chemical Society* 38:2221-2295 doi:10.1021/ja02268a002
- Weber WJ (1972) *Physicochemical processes for water quality control*. Wiley Interscience,
